# Supplementary material for: Robust, high-productivity phototrophic carbon capture at high pH and alkalinity using natural microbial communities
Source: PubMed Central journal article supplement (PMC5372337; doi:10.1186/s13068-017-0769-1), 2017-03-29
Supplement: 13068_2017_769_MOESM1_ESM.pdf [file 13068_2017_769_MOESM1_ESM.pdf]

**Table S1.** Summary of microbial community composition detected in Deer Lake (DL-M) bioreactors on day 58, 85, 98 and 128 using 16S rRNA gene sequencing. Day 0 microbial mat sample is taken from the initial inoculation. Numbers indicate proportion of reads with a > 1% average relative abundance in an OTU compared to all OTUs listed on a per sample basis. Closest cultured relative as determined by BLAST search is shown.

| OTU Number | % total DL-M OTUs | Relative % abundance in duplicate DL-M bioreactors at time point (day) |       |       |       |       |       |       |       |       |                        | Phylum                  | Genus       | Accession No. | % Identity |
|------------|-------------------|------------------------------------------------------------------------|-------|-------|-------|-------|-------|-------|-------|-------|------------------------|-------------------------|-------------|---------------|------------|
|            |                   | 0                                                                      | 58    |       | 85    |       | 98    |       | 128   |       |                        |                         |             |               |            |
|            |                   |                                                                        | BR1   | BR2   | BR1   | BR2   | BR1   | BR2   | BR1   | BR2   |                        |                         |             |               |            |
| 2          | 18.43             | 1.01                                                                   | 3.02  | 3.57  | 16.61 | 24.10 | 20.98 | 31.59 | 40.82 | 33.36 | <i>Proteobacteria</i>  | <i>Wenzhouxiangella</i> | CP012154.1  | 98            |            |
| 1          | 17.15             | 2.04                                                                   | 45.11 | 39.81 | 37.48 | 26.76 | 0.40  | 0.80  | 0.06  | 0.11  | <i>Bacillariophyta</i> | <i>Dickieia</i>         | FJ002229.1  | 99            |            |
| 5          | 8.37              | 2.42                                                                   | 3.11  | 3.94  | 5.82  | 4.88  | 14.34 | 11.88 | 14.19 | 22.39 | <i>Proteobacteria</i>  | <i>Rhodobaca</i>        | EU908048.1  | 100           |            |
| 3          | 6.37              | 0.02                                                                   | 2.07  | 9.71  | 14.34 | 19.12 | 10.48 | 0.48  | 2.04  | 0.56  | <i>Cyanobacteria</i>   | <i>Phormidium</i>       | JN166666.1  | 100           |            |
| 7          | 5.94              | 0.68                                                                   | 2.13  | 3.21  | 4.59  | 2.60  | 13.08 | 13.27 | 3.85  | 3.21  | <i>Bacteroidetes</i>   | <i>Lewinella</i>        | NR_115013.1 | 89            |            |
| 6          | 4.35              | 1.18                                                                   | 0.41  | 0.68  | 1.98  | 4.15  | 10.04 | 9.69  | 3.85  | 4.86  | <i>Proteobacteria</i>  | <i>Chelatococcus</i>    | NR_025428.1 | 98            |            |
| 4          | 4.16              | 0.51                                                                   | 28.18 | 7.49  | 4.64  | 2.30  | 0.40  | 0.14  | 0.09  | 0.09  | <i>Bacillariophyta</i> | <i>Nitzschia</i>        | FJ002224.1  | 99            |            |
| 245        | 3.01              | 0.22                                                                   | 4.19  | 3.90  | 1.14  | 1.81  | 3.50  | 5.70  | 2.41  | 4.39  | <i>Bacteroidetes</i>   | <i>Lewinella</i>        | KF228160.1  | 89            |            |
| 8          | 2.27              | 1.30                                                                   | 0.17  | 0.71  | 1.48  | 1.77  | 4.03  | 3.48  | 6.05  | 3.23  | <i>Proteobacteria</i>  | <i>Rhodobaculum</i>     | KM077018.1  | 99            |            |
| 40         | 1.31              | 2.68                                                                   | 0.12  | 0.09  | 1.42  | 1.46  | 0.94  | 1.45  | 1.72  | 0.67  | <i>Proteobacteria</i>  | <i>Halomonas</i>        | GU113002.1  | 99            |            |
