# Supplementary material for: Robust, high-productivity phototrophic carbon capture at high pH and alkalinity using natural microbial communities
Source: PubMed Central journal article supplement (PMC5372337; doi:10.1186/s13068-017-0769-1), 2017-03-29
Supplement: 13068_2017_769_MOESM2_ESM.pdf [file 13068_2017_769_MOESM2_ESM.pdf]

**Table S2.** Summary of microbial community composition detected in Goodenough Lake (GEL-M) bioreactors on day 58, 85, 98 and 128 using 16S rRNA gene sequencing. Day 0 microbial mat sample is taken from the initial inoculation. Numbers indicate proportion of reads with a > 1% average relative abundance in an OTU compared to all OTUs listed on a per sample basis. Closest cultured relative as determined by BLAST search is shown.

| OTU Number | % total GEL-M OTUs | Relative % abundance in duplicate GEL-M bioreactors at time point (day) |       |       |       |       |       |       |       |       |                            | Phylum                  | Genus       | Accession No. | % Identity |
|------------|--------------------|-------------------------------------------------------------------------|-------|-------|-------|-------|-------|-------|-------|-------|----------------------------|-------------------------|-------------|---------------|------------|
|            |                    | 0                                                                       | 58    |       | 85    |       | 98    |       | 128   |       |                            |                         |             |               |            |
|            |                    |                                                                         | BR1   | BR2   | BR1   | BR2   | BR1   | BR2   | BR1   | BR2   |                            |                         |             |               |            |
| 2          | 15.18              | 0.27                                                                    | 7.04  | 5.11  | 11.34 | 7.33  | 17.32 | 20.07 | 21.30 | 28.56 | <i>Proteobacteria</i>      | <i>Wenzhouxiangella</i> | CP012154.1  | 98            |            |
| 1          | 14.82              | 0.13                                                                    | 36.68 | 40.05 | 26.36 | 19.37 | 0.07  | 0.38  | 0.08  | 0.15  | <i>Bacillariophyta</i>     | <i>Dickieia</i>         | FJ002229.1  | 99            |            |
| 5          | 10.97              | 0.84                                                                    | 2.99  | 3.82  | 3.71  | 3.88  | 10.49 | 13.17 | 20.70 | 21.35 | <i>Proteobacteria</i>      | <i>Rhodobaca</i>        | EU908048.1  | 100           |            |
| 3          | 10.16              | 1.14                                                                    | 20.59 | 21.32 | 29.13 | 42.50 | 0.33  | 1.31  | 0.35  | 0.86  | <i>Cyanobacteria</i>       | <i>Phormidium</i>       | JN166666.1  | 100           |            |
| 245        | 5.06               | 0.50                                                                    | 2.74  | 3.15  | 2.88  | 2.56  | 8.57  | 9.62  | 5.33  | 4.66  | <i>Bacteroidetes</i>       | <i>Lewinella</i>        | KF228160.1  | 89            |            |
| 7          | 4.54               | 1.17                                                                    | 5.25  | 5.25  | 3.90  | 3.91  | 6.47  | 8.15  | 2.40  | 2.08  | <i>Bacteroidetes</i>       | <i>Lewinella</i>        | NR_115013.1 | 89            |            |
| 8          | 4.40               | 0.97                                                                    | 0.40  | 0.35  | 1.05  | 0.97  | 4.69  | 4.25  | 5.76  | 12.53 | <i>Proteobacteria</i>      | <i>Rhodobaculum</i>     | KM077018.1  | 99            |            |
| 6          | 3.93               | 0.37                                                                    | 2.64  | 1.22  | 3.02  | 1.66  | 5.87  | 3.19  | 7.67  | 4.52  | <i>Proteobacteria</i>      | <i>Chelatococcus</i>    | NR_025428.1 | 98            |            |
| 10         | 2.86               | 0.00                                                                    | 2.94  | 3.05  | 0.57  | 0.92  | 6.26  | 4.05  | 1.46  | 0.58  | <i>Verrucomicrobia</i>     | <i>Coraliomargarita</i> | NR_074901.1 | 90            |            |
| 9          | 2.69               | 0.00                                                                    | 0.01  | 0.00  | 0.55  | 0.40  | 8.08  | 5.13  | 1.85  | 2.70  | <i>Bacteroidetes</i>       | <i>Fabibacter</i>       | NR_137379.1 | 91            |            |
| 11         | 1.74               | 0.00                                                                    | 0.26  | 0.15  | 0.50  | 1.37  | 1.58  | 3.40  | 4.64  | 2.57  | <i>Deinococcus-Thermus</i> | <i>Truepera</i>         | NR_074381.1 | 88            |            |
| 13         | 1.32               | 0.00                                                                    | 0.00  | 0.00  | 0.07  | 0.00  | 5.19  | 0.00  | 2.04  | 0.00  | <i>Firmicutes</i>          | <i>Alkalibacterium</i>  | NR_112659.1 | 99            |            |
| 28         | 1.16               | 0.97                                                                    | 0.35  | 0.22  | 0.28  | 0.38  | 1.54  | 1.60  | 2.33  | 1.77  | <i>Proteobacteria</i>      | <i>Wenzhouxiangella</i> | CP012154.1  | 96            |            |
| 12         | 1.08               | 0.50                                                                    | 0.57  | 0.34  | 0.81  | 0.49  | 1.42  | 1.54  | 1.96  | 1.37  | <i>Proteobacteria</i>      | <i>Thioalkalivibrio</i> | NR_074692.1 | 95            |            |
