# Supplementary material for: Robust, high-productivity phototrophic carbon capture at high pH and alkalinity using natural microbial communities
Source: PubMed Central journal article supplement (PMC5372337; doi:10.1186/s13068-017-0769-1), 2017-03-29
Supplement: 13068_2017_769_MOESM3_ESM.pdf [file 13068_2017_769_MOESM3_ESM.pdf]

**Table S3.** Summary of microbial community composition detected in Last Chance Lake (LCL-M) bioreactors on day 58, 85, 98 and 128 using 16S rRNA gene sequencing. Day 0 microbial mat sample is taken from the initial inoculation. Numbers indicate proportion of reads with a > 1% average relative abundance in an OTU compared to all OTUs listed on a per sample basis. Closest cultured relative as determined by BLAST search is shown.

| OTU Number | % total LCL-M OTUs | Relative % abundance in duplicate LCL-M bioreactors at time point (day) |       |       |       |       |       |       |       |       |                        | Phylum                  | Genus       | Accession No. | % Identity |
|------------|--------------------|-------------------------------------------------------------------------|-------|-------|-------|-------|-------|-------|-------|-------|------------------------|-------------------------|-------------|---------------|------------|
|            |                    | 0                                                                       | 58    |       | 85    |       | 98    |       | 128   |       |                        |                         |             |               |            |
|            |                    |                                                                         | BR1   | BR2   | BR1   | BR2   | BR1   | BR2   | BR1   | BR2   |                        |                         |             |               |            |
| 2          | 14.13              | 0.68                                                                    | 1.64  | 4.07  | 12.12 | 10.90 | 25.92 | 32.31 | 29.43 | 22.96 | <i>Proteobacteria</i>  | <i>Wenzhouxiangella</i> | CP012154.1  | 98            |            |
| 5          | 13.52              | 21.58                                                                   | 3.98  | 5.27  | 4.59  | 3.47  | 18.16 | 14.98 | 24.42 | 28.39 | <i>Proteobacteria</i>  | <i>Rhodobaca</i>        | EU908048.1  | 100           |            |
| 4          | 11.11              | 1.52                                                                    | 8.00  | 42.92 | 31.17 | 12.48 | 3.02  | 0.83  | 0.15  | 0.71  | <i>Bacillariophyta</i> | <i>Nitzschia</i>        | FJ002224.1  | 99            |            |
| 1          | 10.69              | 0.64                                                                    | 41.05 | 6.86  | 12.72 | 6.73  | 0.37  | 0.05  | 0.02  | 0.13  | <i>Bacillariophyta</i> | <i>Dickieia</i>         | FJ002229.1  | 99            |            |
| 3          | 7.95               | 0.10                                                                    | 9.27  | 16.99 | 12.68 | 45.39 | 7.50  | 0.93  | 0.15  | 0.16  | <i>Cyanobacteria</i>   | <i>Phormidium</i>       | JN166666.1  | 100           |            |
| 8          | 3.77               | 0.50                                                                    | 0.31  | 1.79  | 1.56  | 1.78  | 6.69  | 6.87  | 11.45 | 6.53  | <i>Proteobacteria</i>  | <i>Rhodobaculum</i>     | KM077018.1  | 99            |            |
| 245        | 3.15               | 0.68                                                                    | 4.14  | 5.29  | 6.93  | 2.36  | 2.79  | 2.40  | 0.70  | 1.14  | <i>Bacteroidetes</i>   | <i>Lewinella</i>        | KF228160.1  | 89            |            |
| 6          | 2.94               | 2.32                                                                    | 0.52  | 0.63  | 1.01  | 0.71  | 4.20  | 3.17  | 9.53  | 7.16  | <i>Proteobacteria</i>  | <i>Chelatococcus</i>    | NR_025428.1 | 98            |            |
| 9          | 1.97               | 0.01                                                                    | 0.00  | 0.00  | 0.00  | 2.99  | 0.70  | 16.74 | 0.39  | 1.19  | <i>Bacteroidetes</i>   | <i>Fabibacter</i>       | NR_137379.1 | 91            |            |
| 128        | 1.88               | 0.82                                                                    | 0.35  | 0.29  | 0.36  | 0.37  | 3.77  | 2.13  | 3.13  | 5.69  | <i>Proteobacteria</i>  | <i>Paracoccus</i>       | NR_116733.1 | 99            |            |
| 22         | 1.49               | 3.60                                                                    | 5.00  | 0.08  | 0.13  | 0.30  | 0.11  | 0.02  | 0.00  | 0.00  | <i>Cyanobacteria</i>   | <i>Halomicronema</i>    | GU220365.1  | 94            |            |
| 18         | 1.47               | 0.69                                                                    | 2.80  | 0.84  | 1.02  | 0.10  | 1.41  | 0.31  | 0.21  | 3.31  | <i>Proteobacteria</i>  | <i>Glycoaulis</i>       | KU561631.1  | 96            |            |
| 13         | 1.20               | 0.03                                                                    | 0.02  | 0.00  | 0.05  | 0.34  | 6.38  | 0.51  | 0.27  | 0.15  | <i>Firmicutes</i>      | <i>Alkalibacterium</i>  | NR_112659.1 | 99            |            |
