# Supplementary material for: Robust, high-productivity phototrophic carbon capture at high pH and alkalinity using natural microbial communities
Source: PubMed Central journal article supplement (PMC5372337; doi:10.1186/s13068-017-0769-1), 2017-03-29
Supplement: 13068_2017_769_MOESM4_ESM.pdf [file 13068_2017_769_MOESM4_ESM.pdf]

**Table S4.** Summary of microbial community composition detected in Probe Lake (PL-M) bioreactors on day 58, 85, 98 and 128 using 16S rRNA gene sequencing. Day 0 microbial mat sample is taken from the initial inoculation. Numbers indicate proportion of reads with a > 1% average relative abundance in an OTU compared to all OTUs listed on a per sample basis. Closest cultured relative as determined by BLAST search is shown.

| OTU Number | % total PL-M OTUs | Relative % abundance in duplicate PL-M bioreactors at time point (day) |       |       |       |       |       |       |       |       |                            | Phylum                  | Genus       | Accession No. | % Identity |
|------------|-------------------|------------------------------------------------------------------------|-------|-------|-------|-------|-------|-------|-------|-------|----------------------------|-------------------------|-------------|---------------|------------|
|            |                   | 0                                                                      | 58    |       | 85    |       | 98    |       | 128   |       |                            |                         |             |               |            |
|            |                   |                                                                        | BR1   | BR2   | BR1   | BR2   | BR1   | BR2   | BR1   | BR2   |                            |                         |             |               |            |
| 2          | 16.03             | 2.40                                                                   | 4.97  | 5.32  | 9.93  | 6.94  | 21.46 | 20.89 | 34.43 | 31.18 | <i>Proteobacteria</i>      | <i>Wenzhouxiangella</i> | CP012154.1  | 98            |            |
| 1          | 14.12             | 1.12                                                                   | 23.37 | 31.48 | 33.21 | 28.57 | 0.25  | 0.08  | 0.16  | 0.31  | <i>Bacillariophyta</i>     | <i>Dickieia</i>         | FJ002229.1  | 99            |            |
| 3          | 10.76             | 1.05                                                                   | 24.87 | 11.68 | 20.60 | 33.64 | 0.34  | 0.38  | 0.16  | 0.59  | <i>Cyanobacteria</i>       | <i>Phormidium</i>       | JN166666.1  | 100           |            |
| 5          | 8.63              | 6.69                                                                   | 2.78  | 4.98  | 3.76  | 2.75  | 11.67 | 18.81 | 9.88  | 18.73 | <i>Proteobacteria</i>      | <i>Rhodobaca</i>        | EU908048.1  | 100           |            |
| 8          | 6.41              | 2.04                                                                   | 0.65  | 1.29  | 2.59  | 1.80  | 9.13  | 7.43  | 16.07 | 15.58 | <i>Proteobacteria</i>      | <i>Rhodobaculum</i>     | KM077018.1  | 99            |            |
| 4          | 5.62              | 1.65                                                                   | 13.79 | 25.22 | 4.73  | 7.24  | 0.22  | 0.13  | 0.10  | 0.53  | <i>Bacillariophyta</i>     | <i>Nitzschia</i>        | FJ002224.1  | 99            |            |
| 7          | 4.01              | 0.24                                                                   | 3.41  | 2.64  | 4.17  | 3.64  | 8.71  | 5.52  | 2.64  | 1.33  | <i>Bacteroidetes</i>       | <i>Lewinella</i>        | NR_115013.1 | 89            |            |
| 245        | 3.50              | 0.37                                                                   | 4.23  | 1.41  | 3.80  | 3.19  | 7.16  | 5.89  | 1.34  | 0.78  | <i>Bacteroidetes</i>       | <i>Lewinella</i>        | KF228160.1  | 89            |            |
| 6          | 3.18              | 1.44                                                                   | 1.26  | 0.71  | 1.39  | 1.00  | 4.02  | 4.06  | 7.65  | 6.16  | <i>Proteobacteria</i>      | <i>Chelatococcus</i>    | NR_025428.1 | 98            |            |
| 19         | 1.77              | 12.88                                                                  | 0.08  | 0.06  | 0.17  | 0.10  | 3.22  | 1.58  | 1.56  | 0.93  | <i>Cyanobacteria</i>       | <i>Cyanobacteria</i>    | NR_102450.1 | 98            |            |
| 12         | 1.18              | 0.51                                                                   | 0.68  | 0.44  | 0.70  | 0.50  | 2.48  | 2.36  | 1.12  | 1.19  | <i>Proteobacteria</i>      | <i>Thioalkalivibrio</i> | NR_074692.1 | 95            |            |
| 11         | 1.06              | 0.01                                                                   | 0.05  | 0.05  | 0.65  | 0.99  | 1.85  | 2.51  | 1.11  | 1.90  | <i>Deinococcus-Thermus</i> | <i>Truepera</i>         | NR_074381.1 | 88            |            |
| 18         | 1.04              | 0.12                                                                   | 0.12  | 0.06  | 0.24  | 0.42  | 1.04  | 2.39  | 1.54  | 4.42  | <i>Proteobacteria</i>      | <i>Glycocalis</i>       | KU561631.1  | 96            |            |
