# Supplementary material for: Robust, high-productivity phototrophic carbon capture at high pH and alkalinity using natural microbial communities
Source: PubMed Central journal article supplement (PMC5372337; doi:10.1186/s13068-017-0769-1), 2017-03-29
Supplement: 13068_2017_769_MOESM5_ESM.pdf [file 13068_2017_769_MOESM5_ESM.pdf]

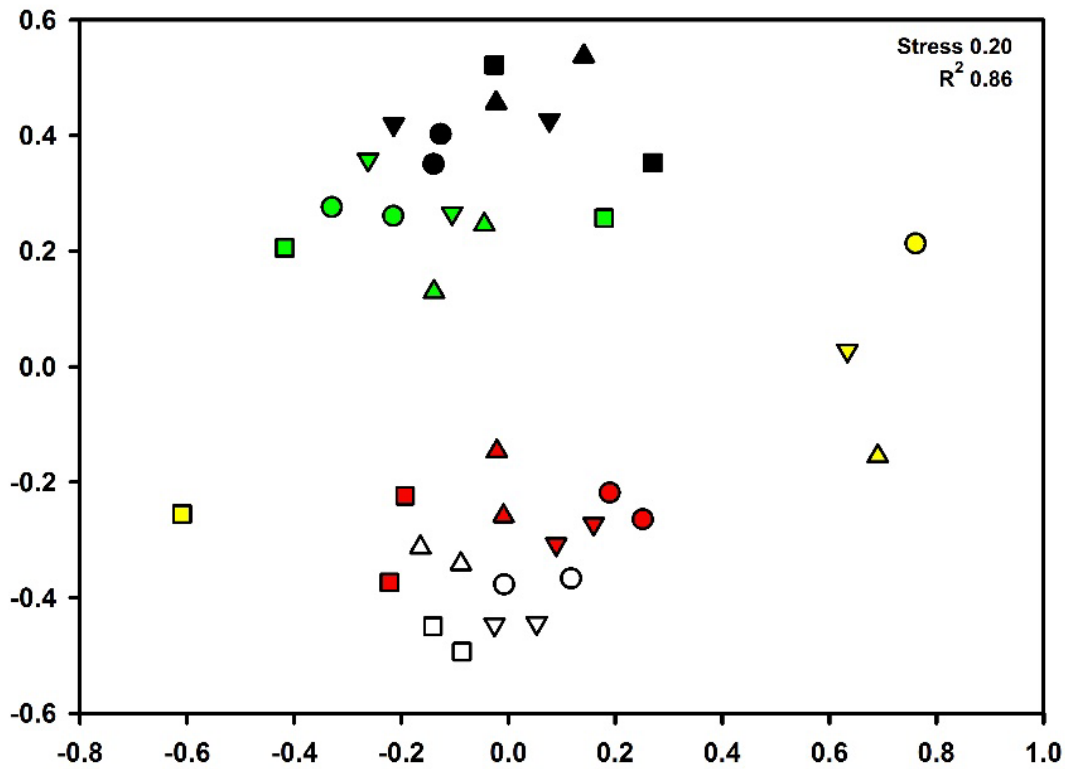

**Figure S1.** Nonmetric multidimensional scaling plot of soda lake bioreactor bacterial communities based on Bray-Curtis similarity showing separation of bioreactors based on time. Sample points formatted by soda lake Deer Lake (DL-M) (Δ), Probe Lake (PL-M) (▼), Lake Chance Lake (LCL-M) (□) and Good Enough Lake (GEL-M) (○) and sampling timepoint (yellow, d 0; black, d 58; green, d 85; red, d 98; white, d 128).
