# Supplementary material for: Robust, high-productivity phototrophic carbon capture at high pH and alkalinity using natural microbial communities
Source: PubMed Central journal article supplement (PMC5372337; doi:10.1186/s13068-017-0769-1), 2017-03-29
Supplement: 13068_2017_769_MOESM6_ESM.pdf [file 13068_2017_769_MOESM6_ESM.pdf]

**Table S5.** Most abundant OTUs (>1% average relative abundance) and closest cultured relatives determined by BLAST search for the wavelength bioreactors.

| OTU | Average Relative Abundance (%) |       |       | Phylum                 | Genus                   | Accession No. | % Identity |
|-----|--------------------------------|-------|-------|------------------------|-------------------------|---------------|------------|
|     | Red                            | White | Blue  |                        |                         |               |            |
| 1   | <1                             | 32.52 | 87.82 | <i>Bacillariophyta</i> | <i>Nitzschia</i>        | FJ002224.1    | 99         |
| 2   | 63.07                          | 34.49 | <1    | <i>Cyanobacteria</i>   | <i>Phormidium</i>       | JN166666.1    | 100        |
| 3   | 8.07                           | 7.17  | 1.37  | <i>Proteobacteria</i>  | <i>Wenzhouxiangella</i> | CP012154.1    | 100        |
| 4   | 2.16                           | 2.00  | <1    | <i>Proteobacteria</i>  | <i>Chelatococcus</i>    | NR_025428.1   | 98         |
| 5   | 2.08                           | 1.77  | <1    | <i>Bacteroidetes</i>   | <i>Lewinella</i>        | NR_115013.1   | 89         |
| 6   | <1                             | 1.90  | <1    | <i>Cyanobacteria</i>   | <i>Cyanobacterium</i>   | NR_102450.1   | 98         |
| 8   | 3.06                           | 2.71  | 1.13  | <i>Proteobacteria</i>  | <i>Rhodobaca</i>        | EU908048.1    | 100        |
| 9   | 2.02                           | 1.05  | <1    | <i>Cyanobacteria</i>   | <i>Phormidium</i>       | HM446280.1    | 94         |
| 11  | 1.86                           | <1    | <1    | <i>Proteobacteria</i>  | <i>Salinispirillum</i>  | NR_134169.1   | 94         |
| 12  | 1.26                           | <1    | <1    | <i>Proteobacteria</i>  | <i>Marinobacter</i>     | KC534446.1    | 96         |
| 162 | 1.75                           | 2.31  | <1    | <i>Bacteroidetes</i>   | <i>Lewinella</i>        | KF228160.1    | 89         |
