# Supplementary material for: Robust, high-productivity phototrophic carbon capture at high pH and alkalinity using natural microbial communities
Source: PubMed Central journal article supplement (PMC5372337; doi:10.1186/s13068-017-0769-1), 2017-03-29
Supplement: 13068_2017_769_MOESM7_ESM.pdf [file 13068_2017_769_MOESM7_ESM.pdf]

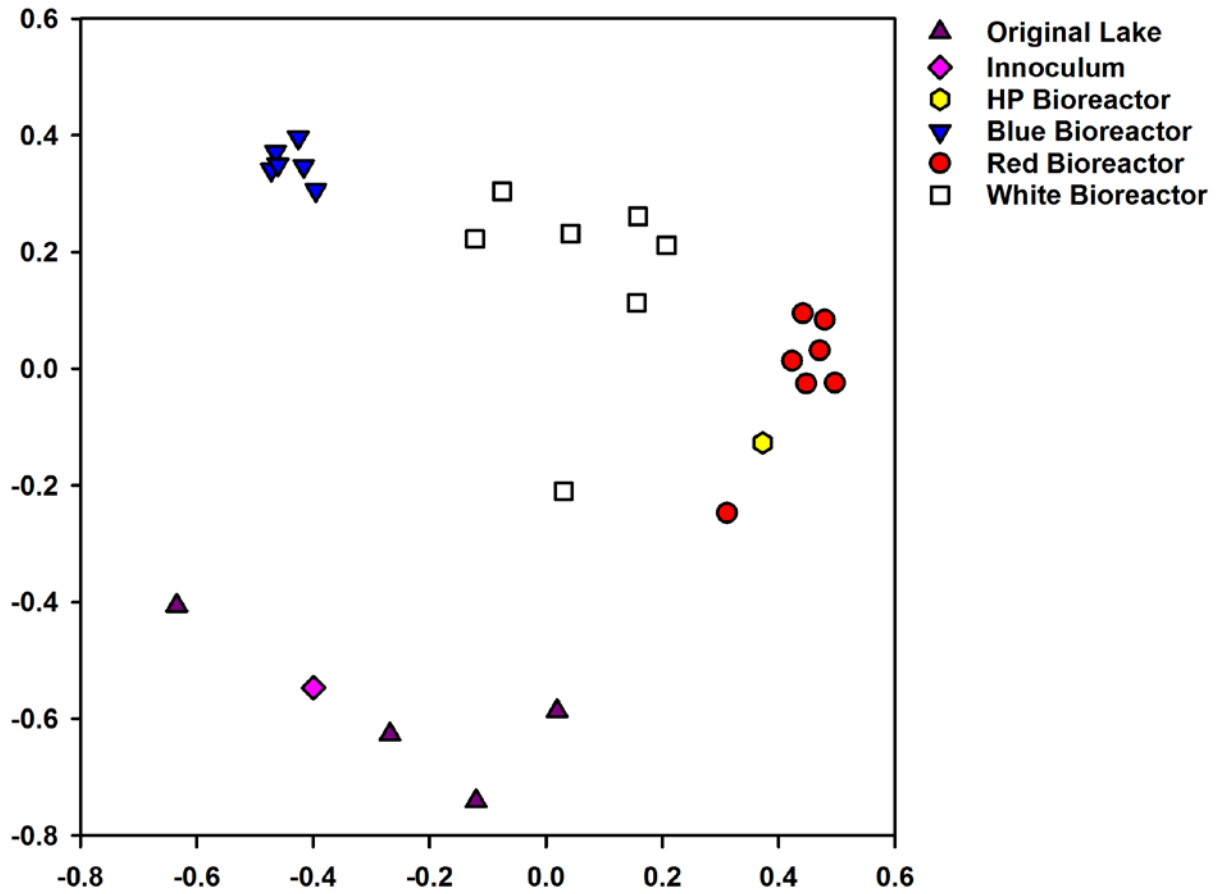

**Figure S2.** Nonmetric multidimensional scaling plot of biofilm microbial communities based on Bray-Curtis showing separation of microbial communities based on wavelength of light. Symbols indicate wavelength of light red ( $\blacktriangledown$ ), white ( $\circ$ ) and blue ( $\square$ ).
