# Supplementary material for: Robust, high-productivity phototrophic carbon capture at high pH and alkalinity using natural microbial communities
Source: PubMed Central journal article supplement (PMC5372337; doi:10.1186/s13068-017-0769-1), 2017-03-29
Supplement: 13068_2017_769_MOESM8_ESM.pdf [file 13068_2017_769_MOESM8_ESM.pdf]

**Table S6.** Most abundant OTUs (>1% average relative abundance) and closest cultured relatives determined by BLAST search for the high productivity (HP) bioreactor.

| OTU | Average Relative Abundance (%) | Phylum                 | Genus                   | Accession No. | % Identity |
|-----|--------------------------------|------------------------|-------------------------|---------------|------------|
| 2   | 53.76                          | <i>Cyanobacteria</i>   | <i>Phormidium</i>       | JN166666.1    | 100        |
| 3   | 10.56                          | <i>Proteobacteria</i>  | <i>Chelatococcus</i>    | NR_025428.1   | 98         |
| 1   | 4.82                           | <i>Bacillariophyta</i> | <i>Nitzschia</i>        | FJ002224.1    | 99         |
| 4   | 4.61                           | <i>Proteobacteria</i>  | <i>Wenzhouxiangella</i> | CP012154.1    | 100        |
| 6   | 2.99                           | <i>Proteobacteria</i>  | <i>Rhodobaca</i>        | EU908048.1    | 100        |
| 8   | 2.88                           | <i>Bacteroidetes</i>   | <i>Owenweeksia</i>      | NR_074100.1   | 90         |
| 22  | 1.97                           | <i>Bacteroidetes</i>   | <i>Brumimicrobium</i>   | LT158299.1    | 92         |
| 9   | 1.55                           | <i>Verrucomicrobia</i> | <i>Fucophilus</i>       | NR_112167.1   | 96         |
| 11  | 1.46                           | <i>Proteobacteria</i>  | <i>Salinispirillum</i>  | NR_134169.1   | 94         |
| 7   | 1.39                           | <i>Bacteroidetes</i>   | <i>Lewinella</i>        | KF228160.1    | 90         |
| 20  | 1.33                           | <i>Bacteroidetes</i>   | <i>Psychroflexus</i>    | KJ782429.2    | 96         |
| 472 | 1.21                           | <i>Bacteroidetes</i>   | <i>Lewinella</i>        | KF228160.1    | 89         |
