# Supplementary material for: Robust, high-productivity phototrophic carbon capture at high pH and alkalinity using natural microbial communities
Source: PubMed Central journal article supplement (PMC5372337; doi:10.1186/s13068-017-0769-1), 2017-03-29
Supplement: 13068_2017_769_MOESM9_ESM.pdf [file 13068_2017_769_MOESM9_ESM.pdf]

**Table S7.** Fatty acid profile of the *Phormidium kuetzingianum* dominated biomass from the red photobioreactor at pH 9.0 and 0.5 M carbonates (day 20).

| Fatty Acid | mol % total fatty acid |
|------------|------------------------|
| br13:0     | 0.7                    |
| 14:0       | 3.0                    |
| 15:0       | 0.5                    |
| i15:0      | 0.7                    |
| 15:1       | 0.4                    |
| 16:0       | 26.7                   |
| i16:0      | 0.4                    |
| 16:1       | 36.7                   |
| 16:2       | 10.3                   |
| 16:4       | 0.5                    |
| 17:0       | 0.2                    |
| cy17:0     | 0.6                    |
| i17:0      | 0.2                    |
| 18:0       | 0.6                    |
| 18:1       | 5.8                    |
| 18:2       | 0.9                    |
| 18:3       | 1.6                    |
| cy19:0     | 0.6                    |
| 20:4       | 1.3                    |
| 20:5       | 8.0                    |
| 22:6       | 0.3                    |
