# Supplementary material for: Robust, high-productivity phototrophic carbon capture at high pH and alkalinity using natural microbial communities
Source: PubMed Central journal article supplement (PMC5372337; doi:10.1186/s13068-017-0769-1), 2017-03-29
Supplement: 13068_2017_769_MOESM10_ESM.pdf [file 13068_2017_769_MOESM10_ESM.pdf]

**Table S8.** Characteristics of the four soda lakes.

| <b>Sample name</b> | <b>Description</b> | <b>Location</b>         | <b>Temp. (°C)</b> | <b>pH</b> | <b>GPS Coordinates</b>       |
|--------------------|--------------------|-------------------------|-------------------|-----------|------------------------------|
| DL-M               | Deer Lake          | Cariboo Plateau, Canada | 19.6              | 10.3      | 51°21'15.42"N 121°14'43.44"W |
| GEL-M              | Goodenough Lake    | Cariboo Plateau, Canada | 24.9              | 10.3      | 51°19'47.64"N 121°38'28.90"W |
| LCL-M              | Last Chance Lake   | Cariboo Plateau, Canada | 25.2              | 10.2      | 51°19'39.3" N 121°37'59.3"W  |
| PL-M               | Probe Lake         | Cariboo Plateau, Canada | 15.5              | 10.3      | 51°27'2.70"N 121°23'15.30"W  |
