# Supplementary material for: Robust, high-productivity phototrophic carbon capture at high pH and alkalinity using natural microbial communities
Source: PubMed Central journal article supplement (PMC5372337; doi:10.1186/s13068-017-0769-1), 2017-03-29
Supplement: 13068_2017_769_MOESM11_ESM.pdf [file 13068_2017_769_MOESM11_ESM.pdf]

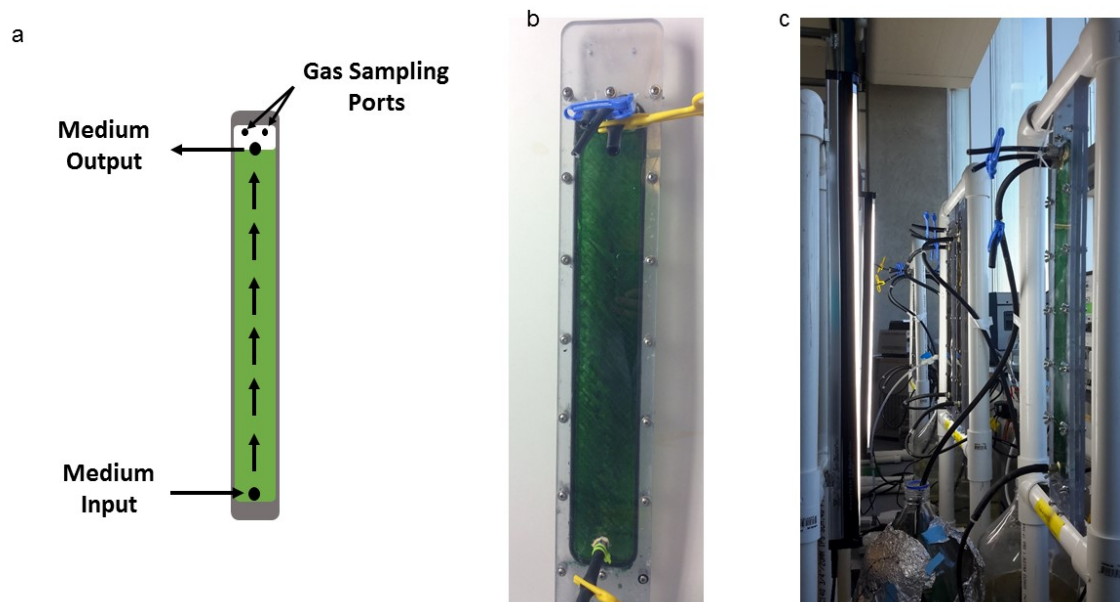

**Figure S3.** Design of the flat panel photobioreactor system showing (a) a schematic of the photobioreactor design and media flow pattern, (b) a photo of an individual photobioreactor, and (c) a photo of the photobioreactor system in operation.
